# Supplementary material for: Constitutive activation of two-component systems reveals regulatory network interactions in Streptococcus agalactiae
Source: PubMed Central journal article supplement (PMC11502775; doi:10.1038/s41467-024-53439-3), 2024-10-24
Supplement: 41467_2024_53439_MOESM3_ESM.pdf [file 41467_2024_53439_MOESM3_ESM.pdf]

## **Description of Additional Supplementary Files:**

**Supplementary Data 1:** TCS-encoding genes in the hypervirulent BM110 strain.

**Supplementary Data 2:** List of strains with sequenced genome.

**Supplementary Data 3:** Antibiotic susceptibility.

**Supplementary Data 4:** Transcriptome analysis of the HK+ collection.

4A: All results - RNA-seq normalized count - Mean of biological triplicate.

4B: All results - Statistical analysis.

4C: Genes excluded from the analysis (rRNA, transposase, mobile genetic elements, no expression).

4D: Differentially expressed genes (DEG) - threshold  $p\text{-adj} < 0.05$

4E: TCS feedback loops.

4F: Activated genes in the HK+ collection ( $FC > 3$ ,  $p\text{-adj} < 0.0001$ )

4G: Repressed genes in the HK+ collection ( $FC < -3$ ,  $p\text{-adj} < 0.0001$ )

4H: Activated regulon in the HK+ collection ( $-3 > FC > 3$ ,  $p\text{-adj} < 0.0001$ )

**Supplementary Data 5:** Oligonucleotides.

**Supplementary Data 6:** Vector and mutant construction.
